# Supplementary material for: Closed-loop glucose control in young people with type 1 diabetes during and after unannounced physical activity: a randomised controlled crossover trial
Source: Springer Nature journal article supplement (doi:10.1007/s00125-017-4395-z), 2017-08-24
Supplement: MOESM1 [file 14238842]

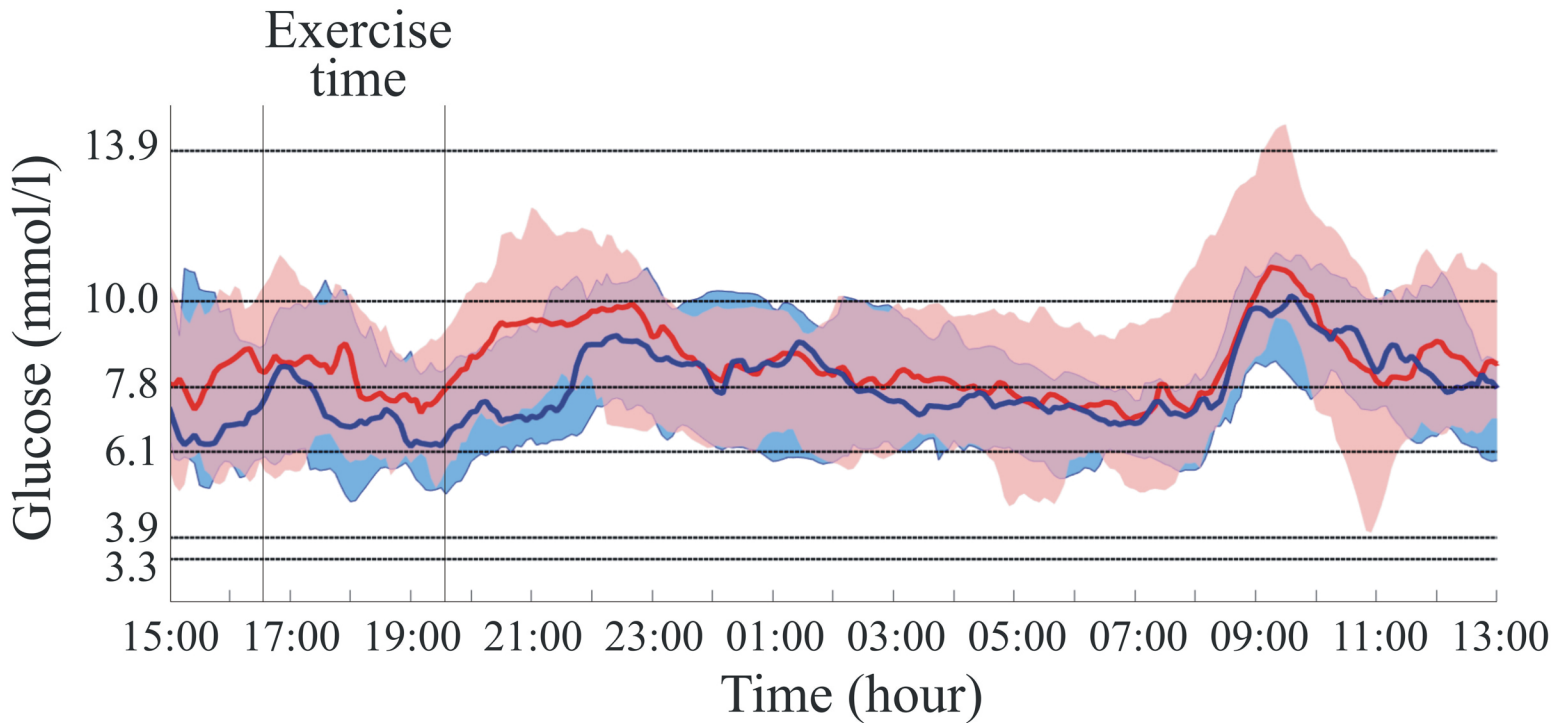

**ESM Figure 1. Median sensor glucose for the whole observational period**  
Median (IQR) sensor glucose during closed-loop (blue) and open-loop (red) insulin delivery, from beginning (15:00) till the end (13:00) of observational period.
